# Supplementary material for: Amino Acid-Based Boron Carriers in Boron Neutron Capture Therapy (BNCT)
Source: MDPI journal article supplement (doi:10.3390/pharmaceutics15122663), 2023-11-23
Supplement: s1 [file s1]

# Amino acid-based boron carriers in Boron Neutron Capture Therapy (BNCT)

Juulia Järvinen <sup>1</sup>, Herkko Pulkkinen <sup>2</sup>, Jarkko Rautio <sup>1</sup> and Juri M. Timonen <sup>1,3,\*</sup>

<sup>1</sup> School of Pharmacy, Faculty of Health Sciences, University of Eastern Finland

<sup>2</sup> Department of Technical Physics, Faculty of Natural Sciences and Forestry, University of Eastern Finland

<sup>3</sup> Drug Research Program, Division of Pharmaceutical Chemistry and Technology, Faculty of Pharmacy, University of Helsinki, Viikinkaari 5E, P.O. Box 56, 00014 Helsinki, Finland

\* Correspondence: [juri.timonen@helsinki.fi](mailto:juri.timonen@helsinki.fi)

## Table of Contents

|                                                                                                                                                     |    |
|-----------------------------------------------------------------------------------------------------------------------------------------------------|----|
| <b>Table S1.</b> <i>In vitro</i> boron accumulation and distribution studies on melanoma models using amino acid-based boron carriers.....          | 2  |
| <b>Table S2.</b> <i>In vitro</i> boron accumulation and distribution studies of brain tumor models using amino acid-based boron carriers.....       | 3  |
| <b>Table S3.</b> <i>In vitro</i> boron accumulation and distribution studies on miscellaneous cell lines using amino acid-based boron carriers..... | 6  |
| <b>Table S4.</b> Biodistribution and PET studies on <i>in vivo</i> melanoma models using amino acid-based boron carriers.....                       | 9  |
| <b>Table S5.</b> Biodistribution and neutron capture studies on <i>in vivo</i> brain tumor models using amino acid-based boron carriers.....        | 10 |
| <b>Table S6.</b> Miscellaneous <i>In vivo</i> studies using amino acid-based boron carriers. ....                                                   | 10 |
| <b>Table S7.</b> <i>In vitro</i> neutron capture survival studies on cancer cell lines using amino acid-based boron carriers.....                   | 11 |
| <b>Table S8.</b> <i>In vivo</i> neutron capture studies using amino acid-based boron carriers. ....                                                 | 11 |
| <b>Table S9.</b> <i>In vitro</i> toxicity studies of amino acid-based boron carriers. ....                                                          | 12 |
| REFERENCES .....                                                                                                                                    | 13 |

**Table S1.** *In vitro* boron accumulation and distribution studies on melanoma models using amino acid-based boron carriers.

| # | Cell line | Comp.                    | Conc.               | Incubation time | Measured boron accumulation                                        | Ref. |
|---|-----------|--------------------------|---------------------|-----------------|--------------------------------------------------------------------|------|
| 1 | B16       | L-BPA                    | 2mM                 | 24 h            | 1.5±0.4 µgB/10 <sup>7</sup> cells <sup>a,b</sup>                   | [1]  |
|   |           | <b>13</b>                |                     |                 | 2.2±0.4 µgB/10 <sup>7</sup> cells <sup>a,b</sup>                   |      |
|   |           | <b>14</b>                |                     |                 | 3.1±0.5 µgB/10 <sup>7</sup> cells <sup>a,b</sup>                   |      |
|   |           | <b>15</b>                |                     |                 | 2.3±0.6 µgB/10 <sup>7</sup> cells <sup>a,b</sup>                   |      |
| 2 |           | BPA*HCl                  | 2mM                 | 3 h             | 1.3±0.1 µgB/10 <sup>7</sup> cells <sup>a,c</sup>                   | [2]  |
|   |           |                          |                     | 12 h            | 2.0±0.1 µgB/10 <sup>7</sup> cells <sup>a,c</sup>                   |      |
|   |           |                          |                     | 24 h            | 2.4±0.1 µgB/10 <sup>7</sup> cells <sup>a,c</sup>                   |      |
|   |           | <b>23</b>                | 2mM                 | 3 h             | 0.5±0.2 µgB/10 <sup>7</sup> cells <sup>a,c</sup>                   |      |
|   |           |                          |                     | 12 h            | 1.9±0.2 µgB/10 <sup>7</sup> cells <sup>a,c</sup>                   |      |
|   |           |                          |                     | 24 h            | 2.0±0.1 µgB/10 <sup>7</sup> cells <sup>a,c</sup>                   |      |
|   |           | <b>24</b>                | 2mM                 | 3 h             | 0.5±0.2 µgB/10 <sup>7</sup> cells <sup>a,c</sup>                   |      |
|   |           |                          |                     | 12 h            | 1.9±0.2 µgB/10 <sup>7</sup> cells <sup>a,c</sup>                   |      |
|   |           |                          |                     | 24 h            | 1.8±0.1 µgB/10 <sup>7</sup> cells <sup>a,c</sup>                   |      |
|   |           | <b>25</b>                | 2mM                 | 3 h             | 0.6±0.2 µgB/10 <sup>7</sup> cells <sup>a,c</sup>                   |      |
|   |           |                          |                     | 12 h            | 1.1±0.1 µgB/10 <sup>7</sup> cells <sup>a,c</sup>                   |      |
|   |           |                          |                     | 24 h            | 1.4±0.2 µgB/10 <sup>7</sup> cells <sup>a,c</sup>                   |      |
| 3 |           | <i>cis</i> - <b>29</b>   | 50 ppm of boron     | 2.5 h           | distribution study <sup>d</sup>                                    | [3]  |
|   |           | <i>trans</i> - <b>29</b> |                     |                 |                                                                    |      |
| 4 | B16F10    | BPA*HCl                  | 1 mg/mL<br>≈ 4.1 mM | 1 h             | 0.2±0.07 µgB/10 <sup>7</sup> cells <sup>a,c</sup>                  | [4]  |
|   |           |                          |                     | 3 h             | 0.6±0.06 µgB/10 <sup>7</sup> cells <sup>a,c</sup>                  |      |
|   |           |                          |                     | 24 h            | 1.6±0.3 µgB/10 <sup>7</sup> cells <sup>a,c</sup>                   |      |
|   |           | BPA                      | 0.1 mM <sup>e</sup> | 1 min           | 0.03±0.01 % dose/mg prot.<br>≈ 0.3±0.1 ngB/mg prot. <sup>b,f</sup> | [5]  |
|   |           |                          |                     | 5 min           | 0.62±0.01 % dose/mg prot.<br>≈ 6±0.1 ngB/mg prot. <sup>b,f</sup>   |      |
|   |           |                          |                     | 30 min          | 0.57±0.06 % dose/mg prot.<br>≈ 6±0.6 ngB/mg prot. <sup>b,f</sup>   |      |
| 5 |           | <b>3</b>                 | 0.1 mM <sup>e</sup> | 1 min           | 0.23±0.03 % dose/mg prot.<br>≈ 2±0.3 ngB/mg prot. <sup>b,f</sup>   |      |
|   |           |                          |                     | 5 min           | 0.59±0.1 % dose/mg prot.<br>≈ 6±1 ngB/mg prot. <sup>b,f</sup>      |      |
|   |           |                          |                     | 30 min          | 0.80±0.07 % dose/mg prot.<br>≈ 8±0.7 ngB/mg prot. <sup>b,f</sup>   |      |
| 6 |           | <b>10</b>                | 1 mM                | 1 h             | 390±3 µgB/10 <sup>7</sup> cells <sup>a,b</sup>                     | [6]  |
|   |           |                          | 2 mM                |                 | 700±3 µgB/10 <sup>7</sup> cells <sup>a,b</sup>                     |      |
|   |           |                          | 5 mM                |                 | 1040±6 µgB/10 <sup>7</sup> cells <sup>a,b</sup>                    |      |
|   |           |                          | 10 mM               |                 | 1280±12 µgB/10 <sup>7</sup> cells <sup>a,b</sup>                   |      |
| 6 | MK-T      | BPA                      | 0.45mM              | 3 h             | 76±4 ngB/mg prot. <sup>a,g</sup>                                   | [7]  |
|   |           |                          |                     | 5 h             | 64±11 ngB/mg prot. <sup>a,g</sup>                                  |      |
|   |           |                          |                     | 10 h            | 37±15 ngB/mg prot. <sup>a,g</sup>                                  |      |
|   |           |                          |                     | 24 h            | 27±9 ngB/mg prot. <sup>a,g</sup>                                   |      |
|   |           |                          |                     | 32 h            | 86±7 ngB/mg prot. <sup>a,g</sup>                                   |      |
|   |           |                          |                     | 48 h            | 110±12 ngB/mg prot. <sup>a,g</sup>                                 |      |
| 7 | A1059     | BPA*HCl                  | 1 mg/mL<br>≈ 4.1 mM | 1 h             | 0.1±0.03 µgB/10 <sup>7</sup> cells <sup>a,c</sup>                  | [4]  |
|   |           |                          |                     | 3 h             | 0.3±0.03 µgB/10 <sup>7</sup> cells <sup>a,c</sup>                  |      |

|    |           |                      |                       |         |                                                    |      |
|----|-----------|----------------------|-----------------------|---------|----------------------------------------------------|------|
|    |           |                      |                       | 24 h    | 0.8±0.05 µgB/10 <sup>7</sup> cells <sup>a,c</sup>  |      |
| 8  | TA1059-1  | BPA*HCl              | 1 mg/mL<br>≈ 4.1 mM   | 1 h     | 0.3±0.07 µgB/10 <sup>7</sup> cells <sup>a,c</sup>  |      |
|    |           |                      |                       | 3 h     | 0.6±0.09 µgB/10 <sup>7</sup> cells <sup>a,c</sup>  |      |
|    |           |                      |                       | 24 h    | 2.0±0.2 µgB/10 <sup>7</sup> cells <sup>a,c</sup>   |      |
|    |           |                      |                       |         |                                                    |      |
| 9  | Ihara     | 5                    | 2 mM                  | 24 h    | Not quantified <sup>h</sup>                        | [8]  |
|    |           | 6                    |                       |         |                                                    |      |
|    |           | 7                    |                       |         |                                                    |      |
|    |           | 8                    |                       |         |                                                    |      |
| 10 | B16F1     | [ <sup>18</sup> F]-9 | 370 kBq               | 15 min  | 5.77±0.21 %AR/10 <sup>5</sup> cells <sup>i</sup>   | [9]  |
|    |           |                      |                       | 30 min  | 6.92±0.24 %AR/10 <sup>5</sup> cells <sup>i</sup>   |      |
|    |           |                      |                       | 60 min  | 8.37±0.46 %AR/10 <sup>5</sup> cells <sup>i</sup>   |      |
|    |           |                      |                       | 120 min | 7.39±1.24 %AR/10 <sup>5</sup> cells <sup>i</sup>   |      |
|    |           |                      |                       | 240 min | 7.26±0.54 %AR/10 <sup>5</sup> cells <sup>i</sup>   |      |
| 11 | MRA 27    | 11                   | 100 µg B/mL<br>≈ 1 mM | 3h      | 3.32±0.61 µgB/10 <sup>7</sup> cells <sup>j,k</sup> | [10] |
| 12 | SK-23 Mel | BPA-F                | 0.05mM                | 2 h     | 17.1±2.0 µgB/L <sup>a,b,l,m</sup>                  | [11] |
|    |           |                      |                       | 6 h     | 14.0±1.7 µgB/L <sup>a,b,l,n</sup>                  |      |
|    |           | 47                   | 0.05mM                | 2 h     | 15.5±1.1 µgB/L <sup>a,b,l,m</sup>                  |      |
|    |           |                      |                       | 6 h     | 7.5±1.4 µgB/L <sup>a,b,l,n</sup>                   |      |
|    |           | 48                   | 0.05mM                | 2 h     | 11.6±1.4 µgB/L <sup>a,b,l,m</sup>                  |      |
|    |           |                      |                       | 6 h     | 8.9±1.4 µgB/L <sup>a,b,l,n</sup>                   |      |

<sup>a</sup>estimated graphically from image of the original publication, <sup>b</sup> measured with Inductively Coupled Plasma Optical Emission Spectroscopy (ICP-OES), <sup>c</sup>measured with Inductively Coupled Plasma Atom Emission Spectroscopy (ICP-AES), <sup>d</sup>measured with Secondary Ion Mass Spectrometry (SIMS) imaging, <sup>e</sup>calculated based on the original paper as follows: concentration of BPA or **3** in solution of 0.5 mg of BPA-fructose mixture with molar ratio 1:2.6 in 1 mL is 1.0 mmol/L, and adding 100 µL into 900 µL results in concentration of 0.1 mM, <sup>f</sup>calculated based on the dose calculated as described above and result normalization described in the original paper as follows: “The accumulation rate was calculated as % dose/mg protein from the quantified dose of boron in added 3-BPA and 4-BPA, respectively (n = 3)” values are from measurements without LAT1-inhibitor, <sup>g</sup>measured with Inductively Coupled Plasma Mass Spectrometry (ICP-MS), <sup>h</sup>measured with Fluorine Nuclear Magnetic Resonance Spectroscopy (F-NMR), <sup>i</sup>measured with gamma counter, uptake expressed as percent of the applied radioactivity used in the assay vial relative to untreated control, <sup>j</sup>measured with Direct-current Plasma Atom Emission Spectrometry (DCP-AES), <sup>k</sup>calculated from data of the original publication, <sup>l</sup>measured from filtrate after scraping cells from Petri dish into 3 mL of water and rinsing the Petri dish with additional 2 mL of water, <sup>m</sup>blank control: 10.0±1.5 µgB/L<sup>a,b,l</sup>, <sup>n</sup>blank control: 5.1±1.6 µgB/L<sup>a,b,l</sup>

**Table S2.** *In vitro* boron accumulation and distribution studies of brain tumor models using amino acid-based boron carriers

| # | Cell line | Comp.                    | Conc.   | Incubation time | Measured boron accumulation                        | Ref. |
|---|-----------|--------------------------|---------|-----------------|----------------------------------------------------|------|
| 1 | C6        | [ <sup>10</sup> B] -BPA  | 1mM     | 24 h            | 0.2 µgB/10 <sup>7</sup> cells <sup>a,b,c</sup>     | [12] |
|   |           | 5                        |         |                 | 0.1 µgB/10 <sup>7</sup> cells <sup>a,b,c</sup>     |      |
|   |           | 7                        |         |                 | 0.1 µgB/10 <sup>7</sup> cells <sup>a,b,c</sup>     |      |
| 2 |           | L-BPA                    | 2mM     | 24 h            | 1.4±0.08 µgB/10 <sup>7</sup> cells <sup>a,d</sup>  | [1]  |
|   |           | 13                       |         |                 | 1.4±0.3 µgB/10 <sup>7</sup> cells <sup>a,d</sup>   |      |
|   |           | 14                       |         |                 | 1.7±0.06 µgB/10 <sup>7</sup> cells <sup>a,d</sup>  |      |
|   |           | 15                       |         |                 | 1.9±0.1 µgB/10 <sup>7</sup> cells <sup>a,d</sup>   |      |
| 3 |           | L-BPA                    | 2mM     | 24 h            | 0.72±0.02 µgB/10 <sup>7</sup> cells <sup>a,d</sup> | [13] |
|   |           | 13                       |         |                 | 0.96±0.7 µgB/10 <sup>7</sup> cells <sup>a,d</sup>  |      |
|   |           | cis-40                   |         |                 | 1.57±0.16 µgB/10 <sup>7</sup> cells <sup>a,d</sup> |      |
|   |           | trans-40                 |         |                 | 2.23±0.14 µgB/10 <sup>7</sup> cells <sup>a,d</sup> |      |
| 4 | U87-MG    | [ <sup>14</sup> C]-L-BPA | 18.5kBq | 5 min           | 1.21±0.21 %AD/10 <sup>5</sup> cells <sup>a,e</sup> | [14] |

|   |        |                          |                     |                     |                                                                  |      |                                                                  |
|---|--------|--------------------------|---------------------|---------------------|------------------------------------------------------------------|------|------------------------------------------------------------------|
|   |        | [ <sup>18</sup> F]-9     | 185 KBq             | 5 min               | 1.16±0.16 %AD/10 <sup>5</sup> cells <sup>a,f</sup>               |      |                                                                  |
| 5 |        | BPA                      | 0.05mM              | 3 min               | 76±<4 ppm <sup>10</sup> B <sup>a,g</sup>                         | [15] |                                                                  |
|   |        |                          |                     | 1 h                 | 20±<4 ppm <sup>10</sup> B <sup>a,g</sup>                         |      |                                                                  |
|   |        |                          |                     | 2 h                 | 30±11 ppm <sup>10</sup> B <sup>a,g</sup>                         |      |                                                                  |
|   |        |                          |                     | 4 h                 | 22±<4 ppm <sup>10</sup> B <sup>a,g</sup>                         |      |                                                                  |
|   |        | 41                       |                     | 3 min               | 20±<4 ppm <sup>10</sup> B <sup>a,g</sup>                         |      |                                                                  |
|   |        |                          |                     | 1 h                 | 17±<4 ppm <sup>10</sup> B <sup>a,g</sup>                         |      |                                                                  |
|   |        |                          |                     | 2 h                 | 23±<4 ppm <sup>10</sup> B <sup>a,g</sup>                         |      |                                                                  |
|   |        |                          |                     | 4 h                 | 33±16 ppm <sup>10</sup> B <sup>a,g</sup>                         |      |                                                                  |
|   |        | 42                       |                     | 3 min               | 22±<4 ppm <sup>10</sup> B <sup>a,g</sup>                         |      |                                                                  |
|   |        |                          |                     | 1 h                 | 20±<4 ppm <sup>10</sup> B <sup>a,g</sup>                         |      |                                                                  |
|   |        |                          |                     | 2 h                 | 30±12 ppm <sup>10</sup> B <sup>a,g</sup>                         |      |                                                                  |
|   |        |                          |                     | 4 h                 | 24±12 ppm <sup>10</sup> B <sup>a,g</sup>                         |      |                                                                  |
|   |        | 43                       |                     | 3 min               | 22±9 ppm <sup>10</sup> B <sup>a,g</sup>                          |      |                                                                  |
|   |        |                          |                     | 1 h                 | 11±<4 ppm <sup>a,g</sup>                                         |      |                                                                  |
|   |        |                          |                     | 2 h                 | 23±6 ppm <sup>10</sup> B <sup>a,g</sup>                          |      |                                                                  |
|   |        |                          |                     | 4 h                 | 16±<4 ppm <sup>10</sup> B <sup>a,g</sup>                         |      |                                                                  |
|   |        | 44                       |                     | 3 min               | 23±<4 ppm <sup>10</sup> B <sup>a,g</sup>                         |      |                                                                  |
|   |        |                          |                     | 1 h                 | 79±22 ppm <sup>10</sup> B <sup>a,g</sup>                         |      |                                                                  |
|   |        |                          |                     | 2 h                 | 171±16 ppm <sup>10</sup> B <sup>a,g</sup>                        |      |                                                                  |
|   |        |                          |                     | 4 h                 | 208±38 ppm <sup>10</sup> B <sup>a,g</sup>                        |      |                                                                  |
|   |        | 45                       |                     | 3 min               | 60±9 ppm <sup>10</sup> B <sup>a,g</sup>                          |      |                                                                  |
|   |        |                          |                     | 1 h                 | 135±40 ppm <sup>10</sup> B <sup>a,g</sup>                        |      |                                                                  |
|   |        |                          |                     | 2 h                 | 314±80 ppm <sup>10</sup> B <sup>a,g</sup>                        |      |                                                                  |
|   |        |                          |                     | 4 h                 | 299±67 ppm <sup>10</sup> B <sup>a,g</sup>                        |      |                                                                  |
|   |        | 46                       |                     | 3 min               | 28±<4ppm <sup>10</sup> B <sup>a,g</sup>                          |      |                                                                  |
|   |        |                          |                     | 1 h                 | 148±27 ppm <sup>10</sup> B <sup>a,g</sup>                        |      |                                                                  |
|   |        |                          |                     | 2 h                 | 346±42 ppm <sup>10</sup> B <sup>a,g</sup>                        |      |                                                                  |
|   |        |                          |                     | 4 h                 | 300±43 ppm <sup>10</sup> B <sup>a,g</sup>                        |      |                                                                  |
| 6 |        | BPA                      | 0.1 mM <sup>h</sup> | 1 min               | 0.13±0.02 % dose/mg prot.<br>≈ ±0.1 ngB/mg prot. <sup>g,i</sup>  | [5]  |                                                                  |
|   |        |                          |                     | 5 min               | 0.20±0.02 % dose/mg prot.<br>≈ 2±0.2 ngB/mg prot. <sup>g,i</sup> |      |                                                                  |
|   |        |                          |                     | 30 min              | 0.48±0.03 % dose/mg prot.<br>≈ 5±0.3 ngB/mg prot. <sup>g,i</sup> |      |                                                                  |
|   |        | 3                        |                     | 0.1 mM <sup>h</sup> | 1 min                                                            |      | 0.33±0.04 % dose/mg prot.<br>≈ 3±0.4 ngB/mg prot. <sup>g,i</sup> |
|   |        |                          |                     |                     | 5 min                                                            |      | 0.28±0.04 % dose/mg prot.<br>≈ 3±0.4 ngB/mg prot. <sup>g,i</sup> |
|   |        |                          |                     |                     | 30 min                                                           |      | 0.45±0.05 % dose/mg prot.<br>≈ 5±0.5 ngB/mg prot. <sup>g,i</sup> |
| 7 | LN-229 | [ <sup>14</sup> C]-L-BPA | 18.5 kBq            | 5 min               | 6.27±0.67 %AD/10 <sup>5</sup> cells <sup>a,e</sup>               | [14] |                                                                  |
|   |        | [ <sup>18</sup> F]-9     | 185 KBq             |                     | 5.74±0.48 %AD/10 <sup>5</sup> cells <sup>a,f</sup>               |      |                                                                  |
| 8 |        | BPA                      | 0.05mM              | 3 min               | 48±8 ppm <sup>10</sup> B <sup>a,g</sup>                          | [15] |                                                                  |
|   |        |                          |                     | 1 h                 | 55±<4 ppm <sup>10</sup> B <sup>a,g</sup>                         |      |                                                                  |
|   |        |                          |                     | 2 h                 | 24±8 ppm <sup>10</sup> B <sup>a,g</sup>                          |      |                                                                  |
|   |        |                          |                     | 4 h                 | 32±<4 ppm <sup>10</sup> B <sup>a,g</sup>                         |      |                                                                  |

|    |          |                          |                                            |                                |                                                                  |      |  |
|----|----------|--------------------------|--------------------------------------------|--------------------------------|------------------------------------------------------------------|------|--|
|    |          | 41                       |                                            | 3 min                          | 38±27 ppm <sup>10</sup> B <sup>a,g</sup>                         |      |  |
|    |          |                          |                                            | 1 h                            | 38±8 ppm <sup>10</sup> B <sup>a,g</sup>                          |      |  |
|    |          |                          |                                            | 2 h                            | 29±<4 ppm <sup>10</sup> B <sup>a,g</sup>                         |      |  |
|    |          |                          |                                            | 4 h                            | 24±<4 ppm <sup>10</sup> B <sup>a,g</sup>                         |      |  |
|    |          | 42                       |                                            | 3 min                          | 17±7 ppm <sup>10</sup> B <sup>a,g</sup>                          |      |  |
|    |          |                          |                                            | 1 h                            | 42±13 ppm <sup>10</sup> B <sup>a,g</sup>                         |      |  |
|    |          |                          |                                            | 2 h                            | 24±9 ppm <sup>10</sup> B <sup>a,g</sup>                          |      |  |
|    |          |                          |                                            | 4 h                            | 27±<4 ppm <sup>10</sup> B <sup>a,g</sup>                         |      |  |
|    |          | 43                       |                                            | 3 min                          | 8±<4 ppm <sup>10</sup> B <sup>a,g</sup>                          |      |  |
|    |          |                          |                                            | 1 h                            | 27±<4 ppm <sup>10</sup> B <sup>a,g</sup>                         |      |  |
|    |          |                          |                                            | 2 h                            | 20±10 ppm <sup>10</sup> B <sup>a,g</sup>                         |      |  |
|    |          |                          |                                            | 4 h                            | 16±<4 ppm <sup>10</sup> B <sup>a,g</sup>                         |      |  |
|    |          | 44                       |                                            | 3 min                          | 47±28 ppm <sup>10</sup> B <sup>a,g</sup>                         |      |  |
|    |          |                          |                                            | 1 h                            | 142±54 ppm <sup>10</sup> B <sup>a,g</sup>                        |      |  |
|    |          |                          |                                            | 2 h                            | 190±10 ppm <sup>10</sup> B <sup>a,g</sup>                        |      |  |
|    |          |                          |                                            | 4 h                            | 212±16 ppm <sup>10</sup> B <sup>a,g</sup>                        |      |  |
|    |          | 45                       |                                            | 3 min                          | 206±68 ppm <sup>10</sup> B <sup>a,g</sup>                        |      |  |
|    |          |                          |                                            | 1 h                            | 459±100 ppm <sup>10</sup> B <sup>a,g</sup>                       |      |  |
|    |          |                          |                                            | 2 h                            | 277±39 ppm <sup>10</sup> B <sup>a,g</sup>                        |      |  |
|    |          |                          |                                            | 4 h                            | 210±30 ppm <sup>10</sup> B <sup>a,g</sup>                        |      |  |
|    |          | 46                       |                                            | 3 min                          | 27±<4 ppm <sup>10</sup> B <sup>a,g</sup>                         |      |  |
|    |          |                          |                                            | 1 h                            | 59±33 ppm <sup>10</sup> B <sup>a,g</sup>                         |      |  |
|    |          |                          |                                            | 2 h                            | 57±42 ppm <sup>10</sup> B <sup>a,g</sup>                         |      |  |
|    |          |                          |                                            | 4 h                            | 109±21 ppm <sup>10</sup> B <sup>a,g</sup>                        |      |  |
| 9  | F98      | [ <sup>10</sup> B]-L-BPA | 1mM                                        | 24 h                           | 3.27 ± 0.3 µg <sup>10</sup> B/10 <sup>7</sup> cells <sup>b</sup> | [13] |  |
|    |          | <i>rac-40</i>            |                                            |                                | 1.97 ± 0.2 µg <sup>10</sup> B/10 <sup>7</sup> cells <sup>b</sup> | [16] |  |
| 10 | T98G     | [ <sup>10</sup> B]-L-BPA | 110 µg/mL B equivalent ≈ 1 mM <sup>j</sup> | 1 h                            | 421 ± 127 µg <sup>10</sup> B/g <sup>k,l</sup>                    | [17] |  |
|    |          |                          |                                            | 2 h                            | 437 ± 126 µg <sup>10</sup> B/g <sup>k,l</sup>                    |      |  |
|    |          |                          |                                            | 6 h                            | 777 ± 337 µg <sup>10</sup> B/g <sup>k,l</sup>                    |      |  |
|    |          |                          |                                            | 8 h                            | 830 ± 162 µg <sup>10</sup> B/g <sup>k,l</sup>                    |      |  |
|    |          |                          |                                            | 16 h                           | 784 ± 218 µg <sup>10</sup> B/g <sup>k,l</sup>                    |      |  |
| 11 | LN-18    | [ <sup>14</sup> C]-L-BPA | 18.5 kBq                                   | 5 min                          | 2.10±0.48 %AD/10 <sup>5</sup> cells <sup>a,e</sup>               | [14] |  |
|    |          | [ <sup>18</sup> F]9      | 185 KBq                                    |                                | 1.84±0.32 %AD/10 <sup>5</sup> cells <sup>a,f</sup>               |      |  |
| 12 | U118 MG  | [ <sup>14</sup> C]-L-BPA | 18.5 kBq                                   | 5 min                          | 4.48±0.65 %AD/10 <sup>5</sup> cells <sup>a,e</sup>               | [14] |  |
|    |          | [ <sup>18</sup> F]9      | 185 KBq                                    |                                | 4.94±0.42 %AD/10 <sup>5</sup> cells <sup>a,f</sup>               |      |  |
| 13 | U-251 MG | [ <sup>14</sup> C]-L-BPA | 18.5 kBq                                   | 5 min                          | 1.98±0.46 %AD/10 <sup>5</sup> cells <sup>a,e</sup>               | [14] |  |
|    |          | [ <sup>18</sup> F]9      | 185 KBq                                    |                                | 1.61±0.16 %AD/10 <sup>5</sup> cells <sup>a,f</sup>               |      |  |
| 14 | U343     | 19                       | 50 µgB/mL ≈ 0.46 mM                        | 30 min                         | 26±<3 µgB/g <sup>a,b,m</sup>                                     | [18] |  |
|    |          |                          |                                            | 1 h                            | 33±3.5 µgB/g <sup>a,b,m</sup>                                    |      |  |
|    |          |                          |                                            | 2 h                            | 47±4.9 µgB/g <sup>a,b,m</sup>                                    |      |  |
|    |          |                          |                                            | 4 h                            | 56±5.8 µgB/g <sup>a,b,m</sup>                                    |      |  |
|    |          |                          |                                            | 8 h                            | 71±7.4 µgB/g <sup>a,b,m</sup>                                    |      |  |
|    |          |                          |                                            | 20 h                           | 88±9.1 µgB/g <sup>a,b,m</sup>                                    |      |  |
|    |          |                          |                                            | 48 h                           | 88±9.3 µgB/g <sup>a,b,m</sup>                                    |      |  |
|    |          | 9 µgB/mL ≈ 0.08 mM       | 20 h                                       | 13±92.2 µgB/g <sup>a,b,m</sup> |                                                                  |      |  |

|    |       |                            |                                                  |      |                                                    |      |
|----|-------|----------------------------|--------------------------------------------------|------|----------------------------------------------------|------|
|    |       |                            | 23 µgB /mL<br>≈ 0.21 mM                          |      | 32±10 µgB/g <sup>a,b,m</sup>                       |      |
|    |       |                            | 47 µgB /mL<br>≈ 0.43 mM                          |      | 70±11 µgB/g <sup>a,b,m</sup>                       |      |
| 15 | G98T  | [ <sup>10</sup> B]-L-BPA-F | 110 µg/mL B<br>equivalent<br>≈ 1 mM <sup>j</sup> | 2 h  | 711 ± 93 µg <sup>10</sup> B/g <sup>k,n</sup>       | [19] |
|    |       |                            |                                                  | 6 h  | 1112 ± 231 µg <sup>10</sup> B/g <sup>k,n</sup>     |      |
|    |       | <i>cis</i> - <b>29</b>     |                                                  | 1 h  | 217 ± 47 µg B/g <sup>k,n</sup>                     |      |
|    |       |                            |                                                  | 2 h  | 240 ± 66 µg B/g <sup>k,n</sup>                     |      |
|    |       |                            |                                                  | 4 h  | 360 ± 77 µg B/g <sup>k,n</sup>                     |      |
|    |       |                            |                                                  | 6 h  | 377 ± 84 µg B/g <sup>k,n</sup>                     |      |
| 16 | A172  | L-BPA                      | 2mM                                              | 24 h | 2.79±0.07 µgB/10 <sup>7</sup> cells <sup>a,d</sup> | [13] |
|    |       | <b>13</b>                  |                                                  |      | 2.95±0.02 µgB/10 <sup>7</sup> cells <sup>a,d</sup> |      |
|    |       | <i>cis</i> - <b>40</b>     |                                                  |      | 3.01±0.08 µgB/10 <sup>7</sup> cells <sup>a,d</sup> |      |
|    |       | <i>trans</i> - <b>40</b>   |                                                  |      | 3.87±0.04 µgB/10 <sup>7</sup> cells <sup>a,d</sup> |      |
| 17 | U81   | L-BPA                      | 2mM                                              | 24 h | 0.690.17 µgB/10 <sup>7</sup> cells <sup>a,d</sup>  | [13] |
|    |       | <b>13</b>                  |                                                  |      | 0.84±0.39 µgB/10 <sup>7</sup> cells <sup>a,d</sup> |      |
|    |       | <i>cis</i> - <b>40</b>     |                                                  |      | 1.39±0.2 µgB/10 <sup>7</sup> cells <sup>a,d</sup>  |      |
|    |       | <i>trans</i> - <b>40</b>   |                                                  |      | 1.58±0.43 µgB/10 <sup>7</sup> cells <sup>a,d</sup> |      |
| 18 | U-251 | L-BPA                      | 2mM                                              | 24 h | 1.1±0.2 µgB/10 <sup>7</sup> cells <sup>a,d</sup>   | [13] |
|    |       | <b>13</b>                  |                                                  |      | 0.53±0.22 µgB/10 <sup>7</sup> cells <sup>a,d</sup> |      |
|    |       | <i>cis</i> - <b>40</b>     |                                                  |      | 0.50±0.14 µgB/10 <sup>7</sup> cells <sup>a,d</sup> |      |
|    |       | <i>trans</i> - <b>40</b>   |                                                  |      | 0.53±0.22 µgB/10 <sup>7</sup> cells <sup>a,d</sup> |      |

<sup>a</sup>estimated graphically from image of the original publication, <sup>b</sup>measured with Inductively Coupled Plasma Atom Emission Spectroscopy (ICP-AES), <sup>c</sup>no error bars reported in original data, <sup>d</sup>measured with Inductively Coupled Plasma Optical Emission Spectroscopy (ICP-OES), <sup>e</sup>percentage of the administered dose per 10<sup>5</sup> cells, measured with scintillation counter, <sup>f</sup>percentage of the administered dose per 10<sup>5</sup> cells, measured with gamma counter, <sup>g</sup>measured with Inductively Coupled Plasma Mass Spectrometry (ICP-MS), <sup>h</sup>calculated based on the original paper as follows: concentration of BPA or **3** in solution of 0.5 mg of BPA-fructose mixture with molar ratio 1:2.6 in 1 mL is 1.0 mmol/L, and adding 100 µL into 900 µL results in concentration of 0.1 mM, <sup>i</sup>calculated based on the dose calculated as described above and result normalization described in the original paper as follows: "The accumulation rate was calculated as % dose/mg protein from the quantified dose of boron in added 3-BPA and 4-BPA, respectively (n = 3)" values are from measurements without LAT1-inhibitor, <sup>j</sup>concentration described in the original paper as follows: "110 µg/ml boron equivalent of <sup>10</sup>BPA", <sup>k</sup>measured using Secondary Ion Mass Spectrometry Imaging (SIMS), <sup>l</sup>µg of <sup>10</sup>B/g (wet weight) summed up from results of three different cell compartments (nucleus, mitochondria-rich perinuclear cytoplasm and remaining cytoplasm), <sup>m</sup>µg of B/g of cells, <sup>n</sup>µg of <sup>10</sup>B/g (wet weight) summed up from results of three different cell compartments (nucleus, mitochondria-rich perinuclear cytoplasm and remaining cytoplasm)

**Table S3.** *In vitro* boron accumulation and distribution studies on miscellaneous cell lines using amino acid-based boron carriers.

| # | Cancer type        | Cell line | Compound                    | Conc.    | Incubation time | Measured boron accumulation                        | Ref. |
|---|--------------------|-----------|-----------------------------|----------|-----------------|----------------------------------------------------|------|
| 1 | Squamous carcinoma | KB        | <sup>10</sup> B-BPA         | 1 mM     | 24 h            | 0.70 µgB/10 <sup>7</sup> cells <sup>a,b,c</sup>    | [12] |
|   |                    |           | <b>5</b>                    |          |                 | 0.70 µgB/10 <sup>7</sup> cells <sup>a,b,c</sup>    |      |
|   |                    |           | <b>7</b>                    |          |                 | 0.75 µgB/10 <sup>7</sup> cells <sup>a,b,c</sup>    |      |
| 2 |                    | FaDu      | [ <sup>14</sup> C]-L-BPA    | 18.5 kBq | 5 min           | 4.63±0.19 %AD/10 <sup>5</sup> cells <sup>a,d</sup> | [14] |
|   |                    |           | [ <sup>18</sup> F] <b>9</b> | 185 KBq  |                 | 4.65±0.39 %AD/10 <sup>5</sup> cells <sup>a,e</sup> |      |
| 3 |                    | SAS       | L-BPA                       | 2 mM     | 24 h            | 2.5±0.7 µgB/10 <sup>7</sup> cells <sup>a,f</sup>   | [1]  |
|   |                    |           | <b>13</b>                   |          |                 | 2.0±0.3 µgB/10 <sup>7</sup> cells <sup>a,f</sup>   |      |
|   |                    |           | <b>14</b>                   |          |                 | 1.6±0.4 µgB/10 <sup>7</sup> cells <sup>a,f</sup>   |      |

|   |                           |        |                              |          |         |                                                    |      |
|---|---------------------------|--------|------------------------------|----------|---------|----------------------------------------------------|------|
|   |                           |        | <b>15</b>                    |          |         | 2.5±0.7 µgB/10 <sup>7</sup> cells <sup>a,f</sup>   |      |
| 4 | Human epithelioma         | HeLa   | <sup>10</sup> B-BPA          | 1 mM     | 24 h    | 0.70 µgB/10 <sup>7</sup> cells <sup>a,b,c</sup>    | [12] |
|   |                           |        | <b>5</b>                     |          |         | 0.65 µgB/10 <sup>7</sup> cells <sup>a,b,c</sup>    |      |
|   |                           |        | <b>7</b>                     |          |         | 0.60 µgB/10 <sup>7</sup> cells <sup>a,b,c</sup>    |      |
| 5 | Epidermal carcinoma       | A-253  | [ <sup>14</sup> C]-L-BPA     | 18.5 kBq | 5 min   | 5.10±0.19 %AD/10 <sup>5</sup> cells <sup>a,d</sup> | [14] |
|   |                           |        | [ <sup>18</sup> F]- <b>9</b> | 185 KBq  |         | 7.23±0.68 %AD/10 <sup>5</sup> cells <sup>a,e</sup> |      |
| 6 | Hepatocellular carcinoma  | HuH-7  | [ <sup>18</sup> F]- <b>9</b> | 370 kBq  | 15 min  | 1.12±0.11 %AR/10 <sup>5</sup> cells <sup>g</sup>   | [9]  |
|   |                           |        |                              |          | 30 min  | 1.29±0.05 %AR/10 <sup>5</sup> cells <sup>g</sup>   |      |
|   |                           |        |                              |          | 60 min  | 1.61±0.09 %AR/10 <sup>5</sup> cells <sup>g</sup>   |      |
|   |                           |        |                              |          | 120 min | 1.22±0.13 %AR/10 <sup>5</sup> cells <sup>g</sup>   |      |
|   |                           |        |                              |          | 240 min | 1.10±0.08 %AR/10 <sup>5</sup> cells <sup>g</sup>   |      |
| 7 | Colorectal adenocarcinoma | CaCo-2 | [ <sup>18</sup> F]- <b>9</b> | 370 kBq  | 15 min  | 2.98±0.30 %AR/10 <sup>5</sup> cells <sup>g</sup>   | [9]  |
|   |                           |        |                              |          | 30 min  | 3.49±0.20 %AR/10 <sup>5</sup> cells <sup>g</sup>   |      |
|   |                           |        |                              |          | 60 min  | 5.24±0.20 %AR/10 <sup>5</sup> cells <sup>g</sup>   |      |
|   |                           |        |                              |          | 120 min | 4.77±0.19 %AR/10 <sup>5</sup> cells <sup>g</sup>   |      |
|   |                           |        |                              |          | 240 min | 4.87±0.21 %AR/10 <sup>5</sup> cells <sup>g</sup>   |      |
| 8 | Healthy tissue            | TIG    | BPA*HCl,                     | 2mM      | 3 h     | 1.1±0.1 µgB/10 <sup>7</sup> cells <sup>a,b</sup>   | [2]  |
|   |                           |        |                              |          | 12 h    | 1.0±0.1 µgB/10 <sup>7</sup> cells <sup>a,b</sup>   |      |
|   |                           |        |                              |          | 24 h    | 1.5±<0.1 µgB/10 <sup>7</sup> cells <sup>a,b</sup>  |      |
|   |                           |        | <b>23</b>                    | 2mM      | 3 h     | 0.3±<0.1 µgB/10 <sup>7</sup> cells <sup>a,b</sup>  |      |
|   |                           |        |                              |          | 12 h    | 0.5±0.2 µgB/10 <sup>7</sup> cells <sup>a,b</sup>   |      |
|   |                           |        |                              |          | 24 h    | 1.0±0.2 µgB/10 <sup>7</sup> cells <sup>a,b</sup>   |      |
|   |                           |        | <b>24</b>                    | 2mM      | 3 h     | 0.3±<0.1 µgB/10 <sup>7</sup> cells <sup>a,b</sup>  |      |
|   |                           |        |                              |          | 12 h    | 0.5±<0.1 µgB/10 <sup>7</sup> cells <sup>a,b</sup>  |      |
|   |                           |        |                              |          | 24 h    | 0.9±<0.1 µgB/10 <sup>7</sup> cells <sup>a,b</sup>  |      |
|   |                           |        | <b>25</b>                    | 2mM      | 3 h     | 0.2±<0.1 µgB/10 <sup>7</sup> cells <sup>a,b</sup>  |      |
|   |                           |        |                              |          | 12 h    | 0.3±<0.1 µgB/10 <sup>7</sup> cells <sup>a,b</sup>  |      |
|   |                           |        |                              |          | 24 h    | 0.6±0.2 µgB/10 <sup>7</sup> cells <sup>a,b</sup>   |      |
| 9 | Healthy tissue            | 3T3    | BPA                          | 0.05 mM  | 3 min   | 32±5 ppm <sup>10</sup> B <sup>a,g</sup>            | [15] |
|   |                           |        |                              |          | 1 h     | 25±8 ppm <sup>10</sup> B <sup>a,g</sup>            |      |
|   |                           |        |                              |          | 2 h     | 41±13 ppm <sup>10</sup> B <sup>a,g</sup>           |      |
|   |                           |        |                              |          | 4 h     | 70±20 ppm <sup>10</sup> B <sup>a,g</sup>           |      |
|   |                           |        | <b>41</b>                    | 0.05 mM  | 3 min   | 21±<5 ppm <sup>10</sup> B <sup>a,g</sup>           |      |
|   |                           |        |                              |          | 1 h     | 22±7 ppm <sup>10</sup> B <sup>a,g</sup>            |      |
|   |                           |        |                              |          | 2 h     | 18±10 ppm <sup>10</sup> B <sup>a,g</sup>           |      |
|   |                           |        |                              |          | 4 h     | 35±8 ppm <sup>10</sup> B <sup>a,g</sup>            |      |
|   |                           |        | <b>42</b>                    | 0.05 mM  | 3 min   | 24±6 ppm <sup>10</sup> B <sup>a,g</sup>            |      |
|   |                           |        |                              |          | 1 h     | 22±10 ppm <sup>10</sup> B <sup>a,g</sup>           |      |
|   |                           |        |                              |          | 2 h     | 30±13 ppm <sup>10</sup> B <sup>a,g</sup>           |      |
|   |                           |        |                              |          | 4 h     | 54±16 ppm <sup>10</sup> B <sup>a,g</sup>           |      |
|   |                           |        | <b>43</b>                    | 0.05 mM  | 3 min   | 13±<5 ppm <sup>10</sup> B <sup>a,g</sup>           |      |
|   |                           |        |                              |          | 1 h     | 20±<5 ppm <sup>10</sup> B <sup>a,g</sup>           |      |
|   |                           |        |                              |          | 2 h     | 15±7 ppm <sup>10</sup> B <sup>a,g</sup>            |      |
|   |                           |        |                              |          | 4 h     | 54±18 ppm <sup>10</sup> B <sup>a,g</sup>           |      |
|   |                           |        | <b>44</b>                    | 0.05 mM  | 3 min   | 10±<5 ppm <sup>10</sup> B <sup>a,g</sup>           |      |

|    |                                 |       |           |                     |        |                                                                   |      |
|----|---------------------------------|-------|-----------|---------------------|--------|-------------------------------------------------------------------|------|
|    |                                 |       |           |                     | 1 h    | 42±5 ppm <sup>10</sup> B <sup>a,g</sup>                           |      |
|    |                                 |       |           |                     | 2 h    | 75±19 ppm <sup>10</sup> B <sup>a,g</sup>                          |      |
|    |                                 |       |           |                     | 4 h    | 40±24 ppm <sup>10</sup> B <sup>a,g</sup>                          |      |
|    |                                 |       | <b>45</b> | 0.05 mM             | 3 min  | 19±<5 ppm <sup>10</sup> B <sup>a,g</sup>                          |      |
|    |                                 |       |           |                     | 1 h    | 48±4 ppm <sup>10</sup> B <sup>a,g</sup>                           |      |
|    |                                 |       |           |                     | 2 h    | 146±58 ppm <sup>10</sup> B <sup>a,g</sup>                         |      |
|    |                                 |       | <b>46</b> | 0.05 mM             | 4 h    | 96±13 ppm <sup>10</sup> B <sup>a,g</sup>                          |      |
|    |                                 |       |           |                     | 3 min  | 18±<5 ppm <sup>10</sup> B <sup>a,g</sup>                          |      |
|    |                                 |       |           |                     | 1 h    | 58±23 ppm <sup>10</sup> B <sup>a,g</sup>                          |      |
|    |                                 |       |           |                     | 2 h    | 75±9 ppm <sup>10</sup> B <sup>a,g</sup>                           |      |
|    |                                 |       |           |                     | 4 h    | 146±13 ppm <sup>10</sup> B <sup>a,g</sup>                         |      |
| 10 | Breast cancer                   | MCF-7 | BPA-F     | 0.05 mM             | 2 h    | 13.2±1.0 µgB/L <sup>a,f,h,j</sup>                                 | [11] |
|    |                                 |       |           |                     | 6 h    | 15.4±0.5 µgB/L <sup>a,f,h,j</sup>                                 |      |
|    |                                 |       | <b>47</b> | 0.05 mM             | 2 h    | 6.8±4.3 µgB/L <sup>a,f,h,j</sup>                                  |      |
|    |                                 |       |           |                     | 6 h    | 7.3±4.4 µgB/L <sup>a,f,h,j</sup>                                  |      |
|    |                                 |       | <b>48</b> | 0.05 mM             | 2 h    | 4.4±3.1 µgB/L <sup>a,f,h,j</sup>                                  |      |
|    |                                 |       |           |                     | 6 h    | 4.9±2.1 µgB/L <sup>a,f,h,j</sup>                                  |      |
| 11 | Human pancreatic adenocarcinoma | T3M-4 | BPA       | 0.1 mM <sup>h</sup> | 1 min  | 0.82±0.11 % dose/mg prot.<br>≈ 8±1.1 ngB/mg prot. <sup>g,i</sup>  | [5]  |
|    |                                 |       |           |                     | 5 min  | 3.28±0.39 % dose/mg prot.<br>≈ 33±3.9 ngB/mg prot. <sup>g,i</sup> |      |
|    |                                 |       |           |                     | 30 min | 5.40±0.45 % dose/mg prot.<br>≈ 54±4.5 ngB/mg prot. <sup>g,i</sup> |      |
|    |                                 |       | <b>3</b>  | 0.1 mM <sup>h</sup> | 1 min  | 0.78±0.09 % dose/mg prot.<br>≈ 8±0.9 ngB/mg prot. <sup>g,i</sup>  |      |
|    |                                 |       |           |                     | 5 min  | 3.55±0.40 % dose/mg prot.<br>≈ 36±4.0 ngB/mg prot. <sup>g,i</sup> |      |
|    |                                 |       |           |                     | 30 min | 5.62±0.63 % dose/mg prot.<br>≈ 56±6.3 ngB/mg prot. <sup>g,i</sup> |      |
| 12 | Human lung carcinoma            | A549  | BPA       | 0.1 mM <sup>h</sup> | 1 min  | 0.14±0.04 % dose/mg prot.<br>≈ 1±0.4 ngB/mg prot. <sup>g,i</sup>  | [5]  |
|    |                                 |       |           |                     | 5 min  | 0.66±0.08 % dose/mg prot.<br>≈ 7±0.8 ngB/mg prot. <sup>g,i</sup>  |      |
|    |                                 |       |           |                     | 30 min | 3.92±0.20 % dose/mg prot.<br>≈ 39±2.0 ngB/mg prot. <sup>g,i</sup> |      |
|    |                                 |       | <b>3</b>  | 0.1 mM <sup>h</sup> | 1 min  | 0.48±0.12 % dose/mg prot.<br>≈ 5±1.2 ngB/mg prot. <sup>g,i</sup>  |      |
|    |                                 |       |           |                     | 5 min  | 1.22±0.13 % dose/mg prot.<br>≈ 12±1.3 ngB/mg prot. <sup>g,i</sup> |      |
|    |                                 |       |           |                     | 30 min | 4.02±0.24 % dose/mg prot.<br>≈ 40±2.4 ngB/mg prot. <sup>g,i</sup> |      |

<sup>a</sup>estimated graphically from image of the original publication, <sup>b</sup>measured with Inductively Coupled Plasma Atom Emission Spectroscopy (ICP-AES), <sup>c</sup>no error bars reported in original data, <sup>d</sup>percentage of the administered dose per 10<sup>5</sup> cells, measured with scintillation counter, <sup>e</sup>percentage of the administered dose per 10<sup>5</sup> cells, measured with gamma counter, <sup>f</sup>measured with Inductively Coupled Plasma Optical Emission Spectroscopy (ICP-OES), <sup>g</sup>measured with gamma counter, uptake expressed as percent of the applied radioactivity used in the assay vial relative to untreated control, <sup>h</sup>measured from filtrate after scrapping cells from Petri dish into 3 mL of water and rinsing the Petri dish with additional 2 mL of water, <sup>i</sup>blank control: 5.9±3.9 µgB/L<sup>a,f,h</sup>, <sup>j</sup>blank control: 7.9±3.2 µgB/L<sup>a,f,h</sup>



**Table S4.** Biodistribution and PET studies on *in vivo* melanoma models using amino acid-based boron carriers.

| #  | Animal & Cancer model                                                                                                     | Compound (administr.)                                                                                                                                            | Study type                           | Analysis method                                          | Ref. |
|----|---------------------------------------------------------------------------------------------------------------------------|------------------------------------------------------------------------------------------------------------------------------------------------------------------|--------------------------------------|----------------------------------------------------------|------|
| 1  | Greenes melanoma transplanted in the anterior chamber or as a sub choroidal transplant in the posterior chamber on rabbit | 750 mg/kg of BPA orally as one dose                                                                                                                              | Biodistribution, neutron irradiation | Radiography                                              | [20] |
| 2  | Greene's melanoma s.c. on Syrian (golden) hamster                                                                         | 100 mg/kg inj i.p. of BPA-F, <b>3-F</b> , <b>4-F</b>                                                                                                             | Biodistribution                      | ICP-AES                                                  | [21] |
| 3  | B16F1 or B16F10 cells transplanted s.c. on C57BL/6 male mice                                                              | 1 mCi inj. i.v. of [ <sup>18</sup> F] <b>9</b>                                                                                                                   | Biodistribution                      | Autoradiograph                                           | [22] |
| 4  | B16-F10 cells implanted s.c. into the right shoulder of C57BL/6 female mice                                               | 11.1 MBq inj. iv. for PET and 2.1 MBq for biodistribution study of [ <sup>18</sup> F] <b>10</b>                                                                  | PET & Biodistribution                | PET and ICP-OES                                          | [6]  |
| 5  | Harding-Passey melanoma implanted i.m. on BALB/c mice                                                                     | 62.5 µg B/g b.w. inj. i.p. of BPA or <b>11</b>                                                                                                                   | Biodistribution                      |                                                          | [10] |
| 6  | Harding-Passey murine melanoma implanted s.c. on BALB/c female mice                                                       | 3, 6, 12 mg inj. i.p. of DL-BPA, L-[ <sup>10</sup> B]BPA, and D-[ <sup>10</sup> B]BPA                                                                            | Biodistribution                      | Prompt-Gamma Boron Analysis, Neutron capture radiography | [23] |
| 7  | B16BL6 melanoma implanted on B6D2F <sub>1</sub> female mice                                                               | 800-1000 ppm B inj. i.v. of <b>30-35</b>                                                                                                                         | Biodistribution                      | ICP-AES                                                  | [24] |
| 8  | B16 cells injected s.c. on female BALB/c mice                                                                             | 24 mg B/kg b.w. inj. i.p. of BPA, <i>cis</i> - <b>30</b> , <i>trans</i> - <b>30</b>                                                                              | biodistribution                      | ICP-OES                                                  | [3]  |
| 9  | B16 cells implanted s.c. in syngeneic female C57BL/6 mice                                                                 | 24 mg B/kg b.w. of BPA-F, DL- <i>cis</i> - <b>29-F</b> , DL- <i>trans</i> - <b>29-F</b> , DL- <i>cis</i> - <b>30-F</b> , DL- <i>trans</i> - <b>30-F</b> inj. ip. | bio- and micro distribution          | ICP-OES, SIMS                                            | [25] |
| 10 | B16F10 cells s.c. in right hind legs of BALB/c mice                                                                       | 1 mg of <b>3-F</b> , BPA-F                                                                                                                                       | biodistribution                      | ICP-MS                                                   | [5]  |

**Table S5.** Biodistribution and neutron capture studies on *in vivo* brain tumor models using amino acid-based boron carriers.

| # | Tumor model                                                                                             | Compounds, dose and administration                                                    | Study type                 | Analysis method | Ref. |
|---|---------------------------------------------------------------------------------------------------------|---------------------------------------------------------------------------------------|----------------------------|-----------------|------|
| 1 | Fischer rats implanted with F98 glioma cells into the right caudate nucleus intracerebral implantation, | 30 mg B/kg b.w. inj. i.v. or i.c. of [ <sup>10</sup> B]BPA                            | Biodistribution            | DCP-AES         | [26] |
| 2 | U-87 MG brain tumor on female BALB/c and SCID mice                                                      | 150 KBq in 100 µL of [ <sup>18</sup> F] <b>9</b> .                                    | Biodistribution            | gamma counter   | [14] |
| 3 | LN-229 brain tumor on female BALB/c and SCID mice                                                       | 150 KBq in 100 µL of [ <sup>18</sup> F] <b>9</b> .                                    | Biodistribution            | gamma counter   | [14] |
| 4 | U-118 MG brain tumor on female BALB/c and SCID mice                                                     | 150 KBq in 100 µL of [ <sup>18</sup> F] <b>9</b> .                                    | Biodistribution            | gamma counter   | [14] |
| 5 | U-251 MG brain tumor on female BALB/c and SCID mice                                                     | 150 KBq in 100 µL of [ <sup>18</sup> F] <b>9</b> a.                                   | Biodistribution            | gamma counter   | [14] |
| 6 | F98 cells implanted intracerebrally into the caudate nucleus of Fischer rats.                           | 31 mg B/kg b.w. inj. i.p. <b>11</b>                                                   | Biodistribution            | DCP-AES         | [10] |
| 7 | F98 cells implanted in the brain of syngeneic Fischer rats                                              | 12 mg B/kg b.w. inj. i.p. of BPA-F or 16 mg B/kg of DL- <i>cis</i> - <b>29</b>        | Bio- and microdistribution | ICP-OES, SIMS   | [25] |
| 8 | F98 cells implanted in the brain of syngeneic Fischer rats                                              | 16 mg B/kg b.w. inj. i.p. of <i>cis</i> - <b>29</b>                                   | Bio- and microdistribution | ICP-OES, SIMS   | [27] |
| 9 | F98 cells implanted in the brain on male Fischer 344 rats                                               | 12 mg B/kg b.w. inj. i.v. of L-BPA, <i>cis</i> - <b>40</b> , <i>trans</i> - <b>40</b> | Biodistribution            | ICP-AES,        | [16] |

**Table S6.** Miscellaneous *In vivo* studies using amino acid-based boron carriers.

| # | Cell type           | Animal & Cancer model               | Compound(s), dose and administration             | Study type      | Analysis method | Ref. |
|---|---------------------|-------------------------------------|--------------------------------------------------|-----------------|-----------------|------|
| 1 | Healthy             | Male ddYY mice                      | 3.5 MBq inj. i.v. of [ <sup>18</sup> F] <b>9</b> | Biodistribution | Not reported    | [28] |
| 2 | Epidermal carcinoma | A253 on female BALB/c and SCID mice | 150 KBq in 100 µL of [ <sup>18</sup> F] <b>9</b> | Biodistribution | gamma counter   | [14] |

|   |                         |                                            |                                           |                 |                 |      |
|---|-------------------------|--------------------------------------------|-------------------------------------------|-----------------|-----------------|------|
| 3 | Squamous cell carcinoma | FaDu on female BALB/c and SCID mice        | 150 KBq in 100 $\mu$ L of [ $^{18}$ F]9   | Biodistribution | gamma counter   | [14] |
| 4 | Carcinoma               | FM3A transplanted s.c. on C3H/He male mice | 1 mCi i.v. inj tail vein of [ $^{18}$ F]9 | Biodistribution | Autoradiography | [22] |

**Table S7.** *In vitro* neutron capture survival studies on cancer cell lines using amino acid-based boron carriers.

| # | Cancer type        | Cell line | Compound(s)            | Concentration    | Incubation time | Neutron source                                      | Ref  |
|---|--------------------|-----------|------------------------|------------------|-----------------|-----------------------------------------------------|------|
| 1 | Melanoma           | Mel-J     | BPA                    | 10 ppm $^{10}$ B | 2 h             | RA-3 Nuclear Reactor, CNEA, Buenos Aires            | [29] |
| 2 | Melanoma           | M8        | BPA                    | 10 ppm $^{10}$ B | 2 h             | RA-3 Nuclear Reactor, CNEA, Buenos Aires, Argentina | [29] |
| 3 | Melanoma           | B16       | L-BPA, <b>13,14,15</b> | 2mM              | 24 h            | Kyoto University Research Reactor                   | [1]  |
| 4 | Glioblastoma       | C6        | L-BPA, <b>13,14,15</b> | 2mM              | 24 h            | Kyoto University Research Reactor                   | [1]  |
| 5 | Squamous carcinoma | SAS       | L-BPA, <b>13,14,15</b> | 2mM              | 24 h            | Kyoto University Research Reactor                   | [1]  |
| 6 | Glioma             | U87       | L-BPA, <b>20</b>       | 1 $\mu$ M to 1mM | 30 to 180 min   | Albany-SUNY Dynamitron accelerator.                 | [30] |

**Table S8.** *In vivo* neutron capture studies using amino acid-based boron carriers.

| # | Tumor model                                                                                                               | Compounds, dose and administration           | Analysis method           | Ref. |
|---|---------------------------------------------------------------------------------------------------------------------------|----------------------------------------------|---------------------------|------|
| 1 | Greenes melanoma transplanted in the anterior chamber or as a sub choroidal transplant in the posterior chamber on rabbit | 750 mg/kg of BPA orally as one dose          | Radiography               | [20] |
| 2 | B16-F10 cells implanted s.c. into the right shoulder of C57BL/6 female mice                                               | 40 mg inj. i.v. of <b>10</b>                 | tumor volume, body weight | [6]  |
| 3 | A1059 or TA1059-1 injected s.c. in buttock on Male C57BL/6 mice                                                           | 400 mg/kg inj. i.p. inj. of [ $^{10}$ B]BPA  | tumor volume              | [4]  |
| 4 | Fischer rats implanted with F98 glioma cells into the right caudate nucleus intracerebral implantation,                   | 30 mg B/kg b.w. inj. i.c. of [ $^{10}$ B]BPA |                           | [26] |

|   |                                                              |                                                                                          |               |      |
|---|--------------------------------------------------------------|------------------------------------------------------------------------------------------|---------------|------|
| 5 | F98 cells implanted in the brain on male Fischer<br>344 rats | 12 mg B/kg b.w. inj. i.v. of<br>L-BPA, <i>cis</i> - <b>40</b> , <i>trans</i> - <b>40</b> | survival time | [16] |
|---|--------------------------------------------------------------|------------------------------------------------------------------------------------------|---------------|------|

**Table S9.** *In vitro* toxicity studies of amino acid-based boron carriers.

| #  | Compound                 | Cell line          | Conc.     | toxicity                            | Ref  |
|----|--------------------------|--------------------|-----------|-------------------------------------|------|
| 1  | L-BPA                    | B16                |           | IC <sub>50</sub> > 2 mM             | [1]  |
|    |                          |                    | 15 mM     | survival 20±1% after 3 days         | [2]  |
|    |                          | C6                 |           | IC <sub>50</sub> > 2 mM             | [1]  |
|    |                          |                    |           | IC <sub>50</sub> > 10 mM            | [13] |
|    |                          | SAS                |           | IC <sub>50</sub> > 2 mM             | [1]  |
|    |                          | U81                |           | IC <sub>50</sub> > 10 mM            | [13] |
|    |                          | A172               |           | IC <sub>50</sub> > 10 mM            |      |
|    |                          | U87 <sup>a</sup>   | 0.1 mM    | 67.0±2.0% viability                 | [15] |
|    |                          | LN229 <sup>b</sup> | 0.1 mM    | 79.6±3.6% viability                 |      |
|    |                          | 3T3 <sup>c</sup>   | 0.1 mM    | 53.0±1.6% viability                 |      |
| 2  | <b>5</b>                 | C6                 | 1-20 mM   | no toxic found                      | [11] |
| 3  | <b>10</b>                | B16-F10            | 50 mM     | no toxicity founs                   | [6]  |
| 4  | <b>11</b>                | MRA 27             |           | IC <sub>50</sub> ≈ 65 µg/mL ≈ 28 mM | [31] |
| 5  | <b>13</b>                | B16                |           | IC <sub>50</sub> = 5.6 mM           | [1]  |
|    |                          | C6                 |           | IC <sub>50</sub> = 6.6 mM           |      |
|    |                          | SAS                |           | IC <sub>50</sub> = 7.8 mM           |      |
|    |                          | U251               |           | IC <sub>50</sub> = 8.8 mM           | [13] |
|    |                          | A172               |           | IC <sub>50</sub> = 5.55 mM          |      |
| 6  | <b>14</b>                | B16                |           | IC <sub>50</sub> = 6.6 mM           | [1]  |
|    |                          | C6                 |           | IC <sub>50</sub> = 2.4 mM           |      |
|    |                          | SAS                |           | IC <sub>50</sub> = 4.9 mM           |      |
| 7  | <b>15</b>                | B16                |           | IC <sub>50</sub> = 5.1 mM           |      |
|    |                          | C6                 |           | IC <sub>50</sub> = 4.7 mM           |      |
|    |                          | SAS                |           | IC <sub>50</sub> = 5.6 mM           |      |
| 8  | <b>18</b>                | MRA 27             |           | IC <sub>50</sub> ≈ 97 µg/mL ≈ 29 mM | [31] |
| 9  | <b>19</b>                | U343               | 0-0.5n mM | no toxicity found                   | [18] |
| 10 | <b>23</b>                | B16                | 15 mM     | survival 60±2% after 3 days         | [2]  |
|    |                          | TIG                | 15 mM     | survival 66±2% after 3 days         |      |
| 11 | <b>24</b>                | B16                | 15 mM     | survival 60±2% after 3 days         |      |
|    |                          | TIG                | 15 mM     | survival 71±2% after 3 days         |      |
| 12 | <b>25</b>                | B16                | 15 mM     | survival 62±2% after 3 days         |      |
|    |                          | TIG                | 15 mM     | survival 73±2% after 3 days         |      |
| 13 | <i>cis</i> - <b>40</b>   | C6                 |           | IC <sub>50</sub> = 2.5 mM           | [13] |
|    |                          | A172               |           | IC <sub>50</sub> = 2.0 mM           |      |
|    |                          | U251               |           | IC <sub>50</sub> > 10 mM            |      |
| 14 | <i>trans</i> - <b>40</b> | C6                 |           | IC <sub>50</sub> = 2.1 mM           | [13] |
|    |                          | A172               |           | IC <sub>50</sub> = 1.9 mM           |      |
|    |                          | U251               |           | IC <sub>50</sub> > 10 mM            |      |

|    |           |           |          |                        |      |
|----|-----------|-----------|----------|------------------------|------|
| 15 | <b>41</b> | U87       | 0.1 mM   | 61.3±5.0% viability    | [15] |
|    |           | LN229     | 0.1 mM   | 57.2±6.2% viability    |      |
|    |           | 3T3       | 0.1 mM   | 109.9 ± 1.1% viability |      |
| 16 | <b>42</b> | U87       | 0.1 mM   | 66.2±3.2% viability    |      |
|    |           | LN229     | 0.1 mM   | 69.9±2.9% viability    |      |
|    |           | 3T3       | 0.1 mM   | 42.9±0.7% viability    |      |
| 17 | <b>43</b> | U87       | 0.1 mM   | 65.8±3.3% viability    |      |
|    |           | LN229     | 0.1 mM   | 67.3±1.9% viability    |      |
|    |           | 3T3       | 0.1 mM   | 47.6 ± 1.5% viability  |      |
| 18 | <b>44</b> | U87       | 0.1 mM   | 60.1±1.9% viability    |      |
|    |           | LN229     | 0.1 mM   | 53.2±2.0% viability    |      |
|    |           | 3T3       | 0.1 mM   | 63.6±0.9% viability    |      |
| 19 | <b>45</b> | U87       | 0.1 mM   | 67.4±1.6% viability    |      |
|    |           | LN229     | 0.1 mM   | 60.7±5.2% viability    |      |
|    |           | 3T3       | 0.1 mM   | 60.2±2.3% viability    |      |
| 20 | <b>46</b> | U87       | 0.1 mM   | 70.2±0.1% viability    |      |
|    |           | LN229     | 0.1 mM   | 70.8±1.4% viability    |      |
|    |           | 3T3       | 0.1 mM   | 66.6±1.8% viability    |      |
| 21 | <b>47</b> | SK-23 Mel | 0-0.1 mM | < 5% toxicity          | [11] |
|    |           | MCF-7     | 0-0.1 mM | < 5% toxicity          |      |

<sup>a</sup>the used 1% DMSO showed 97% viability, <sup>b</sup>the used 1% DMSO showed 91% viability, <sup>c</sup>the used 1% DMSO showed 57% viability

## REFERENCES

- Hattori, Y.; Kusaka, S.; Mukumoto, M.; Uehara, K.; Asano, T.; Suzuki, M.; Masunaga, S.; Ono, K.; Tanimori, S.; Kirihaata, M. Biological Evaluation of Dodecaborate-Containing L-Amino Acids for Boron Neutron Capture Therapy. *J. Med. Chem.* **2012**, *10*, 6980–6984.
- Nemoto, H.; Cai, J.; Asao, N.; Iwamoto, S.; Yamamoto, Y. Synthesis and Biological Properties of Water-Soluble p-Boronophenylalanine Derivatives. Relationship between Water Solubility, Cytotoxicity, and Cellular Uptake. *J. Med. Chem.* **1995**, *38*, 1673–1678, doi:10.1021/jm00010a012.
- Kabalka, G.W.; Shaikh, A.L.; Barth, R.F.; Huo, T.; Yang, W.; Gordnier, P.M.; Chandra, S. Boronated unnatural cyclic amino acids as potential delivery agents for neutron capture therapy. *Appl. Radiat. Isot.* **2011**, *69*, 1778–1781, doi:10.1016/j.apradiso.2011.03.035.
- Tsuboi, T.; Kondoh, H.; Hiratsuka, J.; Mishima, Y. Enhanced Melanogenesis Induced by Tyrosinase Gene-Transfer Increases Boron-Uptake and Killing Effect of Boron Neutron Capture Therapy for Amelanotic Melanoma. *Pigment Cell Res.* **1998**, *11*, 275–282, doi:10.1111/j.1600-0749.1998.tb00736.x.
- Kondo, N.; Hirano, F.; Temma, T. Evaluation of 3-Borono-L-Phenylalanine as a Water-Soluble Boron Neutron Capture Therapy Agent. *Pharmaceutics* **2022**, *14*, doi:10.3390/pharmaceutics14051106.
- Li, J.; Shi, Y.; Zhang, Z.; Liu, H.; Lang, L.; Liu, T.; Chen, X.; Liu, Z. A Metabolically Stable Boron-Derived Tyrosine Serves as a Theranostic Agent for Positron Emission Tomography Guided Boron Neutron Capture Therapy. *Bioconj. Chem.* **2019**, *30*, 2870–2878, doi:10.1021/acs.bioconjchem.9b00578.
- Belkhou, R.; Abbé, J.C.; Pham, P.; Jasner, N.; Sahel, J.; Dreyfus, H.; Moutaouakkil, M.; Massarelli, R. Uptake and metabolism of boronophenylalanine in human uveal melanoma cells in culture

Relevance to boron neutron capture therapy of cancer cells. *Amino Acids* **1995**, *8*, 217–229, doi:10.1007/BF00806495.

8. Hattori, Y.; Yamamoto, H.; Ando, H.; Kondoh, H.; Asano, T.; Kiriata, M.; Yamaguchi, Y.; Wakamiya, T. Synthesis and evaluation as MRI probe of the trifluoromethylated p-boronophenylalanine and its alcohol derivative. *Bioorganic Med. Chem.* **2007**, *15*, 2198–2205, doi:10.1016/j.bmc.2006.12.043.
9. Wingelhofer, B.; Kreis, K.; Mairinger, S.; Muchitsch, V.; Stanek, J.; Wanek, T.; Langer, O.; Kuntner, C. Preloading with L-BPA, L-tyrosine and L-DOPA enhances the uptake of [18F]FBPA in human and mouse tumour cell lines. *Appl. Radiat. Isot.* **2016**, *118*, 67–72, doi:10.1016/j.apradiso.2016.08.026.
10. Yong, J.-H.; Barth, R.F.; Wyzlic, I.M.; Soloway, A.H.; Rotaru, J.H. In vitro and in vivo evaluation of o-Carboranylalanine as a potential boron delivery agent for neutron capture therapy. *Anticancer Res.* **1995**, *16*, 113–120.
11. Bonjoch, J.; Drew, M.G.B.; González, A.; Greco, F.; Jawaid, S.; Osborn, H.M.I.; Williams, N.A.O.; Yaqoob, P. Synthesis and evaluation of novel boron-containing complexes of potential use for the selective treatment of malignant melanoma. *J. Med. Chem.* **2008**, *51*, 6604–6608, doi:10.1021/jm8007745.
12. Hattori, Y.; Asano, T.; Niki, Y.; Kondoh, H.; Kiriata, M.; Yamaguchi, Y.; Wakamiya, T. Study on the compounds containing 19F and 10B atoms in a single molecule for the application to MRI and BNCT. *Bioorganic Med. Chem.* **2006**, *14*, 3258–3262, doi:10.1016/j.bmc.2005.10.062.
13. Hattori, Y.; Kusaka, S.; Mukumoto, M.; Ishimura, M.; Ohta, Y.; Takenaka, H.; Uehara, K.; Asano, T.; Suzuki, M.; Masunaga, S.I.; et al. Synthesis and in vitro evaluation of thiododecaborated  $\alpha$ ,  $\alpha$ -Cycloalkylamino acids for the treatment of malignant brain tumors by boron neutron capture therapy. *Amino Acids* **2014**, *46*, 2715–2720, doi:10.1007/s00726-014-1829-5.
14. Yoshimoto, M.; Honda, N.; Kurihara, H.; Hiroi, K.; Nakamura, S.; Ito, M.; Shikano, N.; Itami, J.; Fujii, H. Non-invasive estimation of 10B-4-borono-L-phenylalanine-derived boron concentration in tumors by PET using 4-borono-2-18F-fluoro-phenylalanine. *Cancer Sci.* **2018**, *109*, 1617–1626, doi:10.1111/cas.13553.
15. Chio, C.M.; Huang, Y.C.; Chou, Y.C.; Hsu, F.C.; Lai, Y.B.; Yu, C.S. Boron Accumulation in Brain Tumor Cells through Boc-Protected Tryptophan as a Carrier for Boron Neutron Capture Therapy. *ACS Med. Chem. Lett.* **2020**, *11*, 589–596, doi:10.1021/acsmchemlett.0c00064.
16. Futamura, G.; Kawabata, S.; Nonoguchi, N.; Hiramatsu, R.; Toho, T.; Tanaka, H.; Masunaga, S.I.; Hattori, Y.; Kiriata, M.; Ono, K.; et al. Evaluation of a novel sodium borocaptate-containing unnatural amino acid as a boron delivery agent for neutron capture therapy of the F98 rat glioma. *Radiat. Oncol.* **2017**, *12*, 1–11, doi:10.1186/s13014-017-0765-4.
17. Chandra, S.; Lorey, D.R. SIMS ion microscopy imaging of boronophenylalanine (BPA) and 13C15N-labeled phenylalanine in human glioblastoma cells: Relevance of subcellular scale observations to BPA-mediated boron neutron capture therapy of cancer. *Int. J. Mass Spectrom.* **2007**, *260*, 90–101, doi:10.1016/j.ijms.2006.09.006.
18. Olsson, P.; Black, M.; Capala, J.; Coderre, J.; Hartman, T.; Makar, M.; Malmquist, J.; Pettersson, J.; Tilly, N.; Sjöberg, S.; et al. Uptake, toxicity and radiation effects of the boron compounds DAAC-1 and DAC-1 in cultured human glioma cells. *Int. J. Radiat. Oncol. Biol.* **1998**, *73*.
19. Chandra, S.; Ahmad, T.; Barth, R.F.; Kabalka, G.W. Quantitative evaluation of boron neutron capture therapy (BNCT) drugs for boron delivery and retention at subcellular-scale resolution in human glioblastoma cells with imaging secondary ion mass spectrometry (SIMS). *J. Microsc.* **2014**, *254*, 146–156, doi:10.1111/jmi.12126.

20. Packer, S.; Coderre, J.; Saraf, S.; Fairchild, R.; Hansrote, J.; Perry, H. Boron neutron capture therapy of anterior chamber melanoma with p- boronophenylalanine. *Investig. Ophthalmol. Vis. Sci.* **1992**, *33*, 395–403.
21. Hiratsuka, J.; Yoshino, K.; Kondoh, H.; Imajo, Y.; Mishima, Y. Biodistribution of boron concentration on melanoma-bearing hamsters after administration of p-, m-, o-boronophenylalanine. *Japanese J. Cancer Res.* **2000**, *91*, 446–450, doi:10.1111/j.1349-7006.2000.tb00965.x.
22. Kubota, R.; Yamada, S.; Ishiwata, K.; Tada, M.; Ido, T.; Kubota, K. Cellular accumulation of 18f-labelled boronophenylalanine depending on DNA synthesis and melanin incorporation: A double-tracer microautoradiographic study of B16 melanomas in vivo. *Br. J. Cancer* **1993**, *67*, 701–705, doi:10.1038/bjc.1993.129.
23. Coderre, J.A.; Glass, J.D.; Fairchild, R.G.; Roy, U.; Cohen, S.; Fand, I. Selective Targeting of Boronophenylalanine to Melanoma in BALB/c Mice for Neutron Capture Therapy. *Cancer Res.* **1987**, *47*, 6377–6383.
24. Kabalka, G.W.; Wu, Z.Z.; Yao, M.; Natarajan, N. The syntheses and in vivo biodistribution of novel boronated unnatural amino acids. **2004**, *61*, 1111–1115, doi:10.1016/j.apradiso.2004.05.012.
25. Barth, R.F.; Kabalka, G.W.; Yang, W.; Huo, T.; Nakkula, R.J.; Shaikh, A.L.; Haider, S.A.; Chandra, S. Evaluation of unnatural cyclic amino acids as boron delivery agents for treatment of melanomas and gliomas. *Appl. Radiat. Isot.* **2014**, *88*, 38–42, doi:10.1016/j.apradiso.2013.11.133.
26. Barth, R.F.; Yang, W.; Rotaru, J.H.; Moeschberger, M.L.; Joel, D.D.; Nawrocky, M.M.; Goodman, J.H.; Soloway, A.H. Boron neutron capture therapy of brain tumors: Enhanced survival following intracarotid injection of either sodium borocaptate or boronophenylalanine with or without blood-brain barrier disruption. *Cancer Res.* **1997**, *57*, 1129–1136, doi:10.1016/S0360-3016(00)00421-1.
27. Chandra, S.; Barth, R.F.; Haider, S.A.; Yang, W.; Huo, T.; Shaikh, A.L.; Kabalka, G.W. Biodistribution and Subcellular Localization of an Unnatural Boron-Containing Amino Acid (Cis-ABCPC) by Imaging Secondary Ion Mass Spectrometry for Neutron Capture Therapy of Melanomas and Gliomas. *PLoS One* **2013**, *8*, doi:10.1371/journal.pone.0075377.
28. Ishiwata, K.; Ido, T.; Mejia, A.A.; Ichihashi, M.; Mishima, Y. Synthesis and radiation dosimetry of 4-borono-2-[18F]fluoro-d,l-phenylalanine: A target compound for PET and boron neutron capture therapy. *Int. J. Radiat. Appl. Instrumentation. Part* **1991**, *42*, 325–328, doi:10.1016/0883-2889(91)90133-L.
29. Rossini, A.E.; Dagrosa, M.A.; Portu, A.; Saint Martin, G.; Thorp, S.; Casal, M.; Navarro, A.; Juvenal, G.J.; Pisarev, M.A. Assessment of biological effectiveness of boron neutron capture therapy in primary and metastatic melanoma cell lines. *Int. J. Radiat. Biol.* **2015**, *91*, 81–89, doi:10.3109/09553002.2014.942013.
30. He, T.; Musah, R.A. Evaluation of the Potential of 2-Amino-3-(1,7-dicarba- closo-dodecaboranyl-1-thio)propanoic acid as a boron neutron capture therapy agent. *ACS Omega* **2019**, *4*, 3820–3826, doi:10.1021/acsomega.8b03407.
31. Yong, J.H.; Barth, R.F.; Rotaru, J.H.; Wyzlic, I.M.; Soloway, A.H. Evaluation of in vitro cytotoxicity of carboranyl amino acids, their chemical precursors and nido carboranyl amino acids for Boron Neutron Capture Therapy. *Anticancer Res.* **1995**, *15*, 2039–2043.
